# Supplementary material for: Two-Step Dry Gel Method Produces MgAPO-11 with Low Aspect Ratio and Improved Catalytic Performance in the Conversion of Methanol to Hydrocarbons
Source: MDPI journal article supplement (doi:10.3390/catal12040413), 2022-04-07
Supplement: s1 [file s1]

# Two-Step Dry Gel Method Produces MgAPO-11 with Low Aspect Ratio and Improved Catalytic Performance in the Conversion of Methanol to Hydrocarbons

Lina Zhang <sup>1,2</sup>, Daniel Sean Firth <sup>1</sup>, Unni Olsbye <sup>1,\*</sup> and Xiaojun Bao <sup>3</sup>

<sup>1</sup> Center for Materials Science and Nanotechnology, Department of Chemistry, University of Oslo, P.O. Box 1033 Blindern, N-0315 Oslo, Norway; upczhlina@163.com (L.Z.); danielfirth.mail@gmail.com (D.S.F.)

<sup>2</sup> Sinopec Beijing Research Institute of Chemical Industry, Beijing 100728, China

<sup>3</sup> National Engineering Research Center of Chemical Fertilizer, College of Chemical Engineering, Fuzhou University, Fuzhou 350116, China; baoxj@fzu.edu.cn

\* Correspondence: unni.olsbye@kjemi.uio.no; Tel.: +47-22-85-54-56

**Abstract:** In this article, the synthesis, characterization and catalytic performance of three MgAPO-11 catalysts with distinct crystal morphologies (sunflower, ball and candy) are presented. Among the three samples, the candy-like MgAPO-11-C, with high crystallinity and uniform particle size (of about 1  $\mu\text{m}$ ), was synthesized for the first time by using a unique two-step dry gel method. Despite the similar acid strength of the three samples, the different and distinct morphologies of the catalysts resulted in very different methanol-to-hydrocarbons (MTH) performances. In particular, the candy-like MgAPO-11-C presented the best MTH performance with the highest total conversion capacity (4.4  $\text{g}_{\text{MeOH}} \cdot \text{g}_{\text{catalyst}}^{-1} \text{ h}^{-1}$ ) and the best selectivity to  $\text{C}_{5+}$  aliphatics (64%).

**Keywords:** MgAPO-11; methanol to hydrocarbons; dry gel method; crystal morphology; candy like

---

**Table S1.** Amount and distribution of acid sites of MgAPO-11 with different Mg contents.

| Sample           | Amount ( $\mu\text{mol/g}$ ) and distribution of acid sites |    |     | Strong acid sites ( $350\text{ }^{\circ}\text{C}$ ) |    |     |
|------------------|-------------------------------------------------------------|----|-----|-----------------------------------------------------|----|-----|
|                  | B                                                           | L  | B+L | B                                                   | L  | B+L |
| MgAPO-11-C-0Mg   | 4                                                           | 26 | 30  | 4                                                   | 9  | 13  |
| MgAPO-11-C-0.1Mg | 31                                                          | 76 | 107 | 9                                                   | 67 | 76  |
| MgAPO-11-C-0.2Mg | 14                                                          | 60 | 74  | 4                                                   | 29 | 33  |

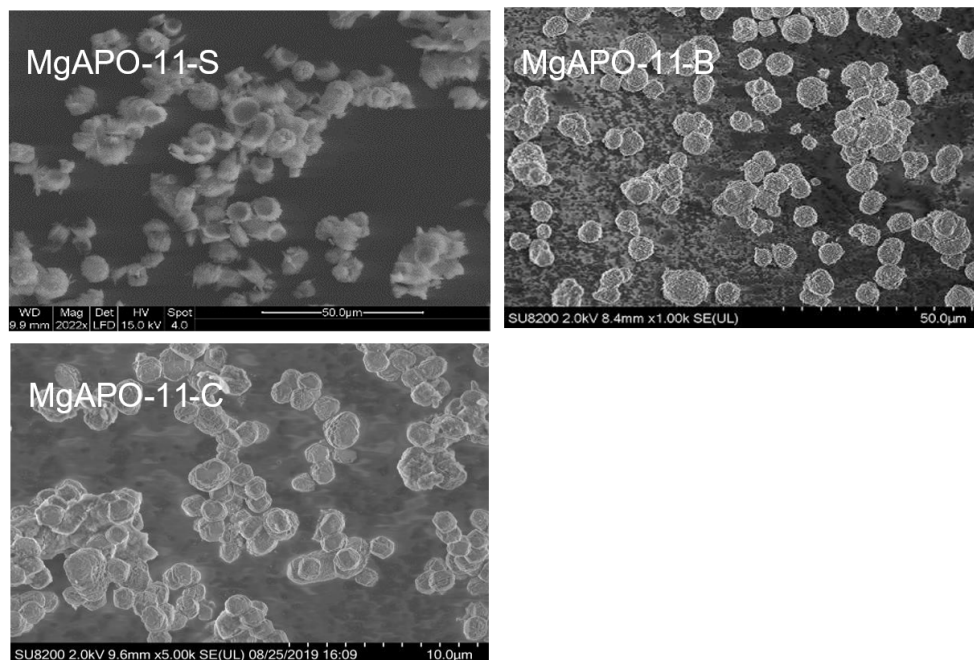

**Figure S1.** SEM images of the three MgAPO-11 samples with distinct morphologies in low magnification.

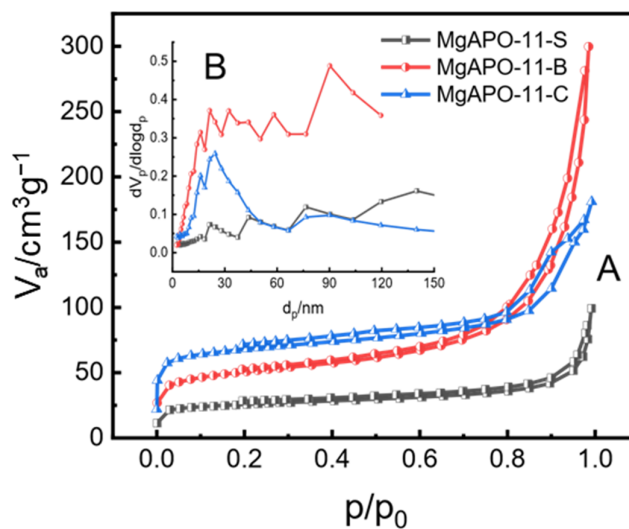

**Figure S2.**  $\text{N}_2$  adsorption-desorption isotherms (A) and pore-size distribution patterns of the three MgAPO-11 samples with distinct morphologies (B).

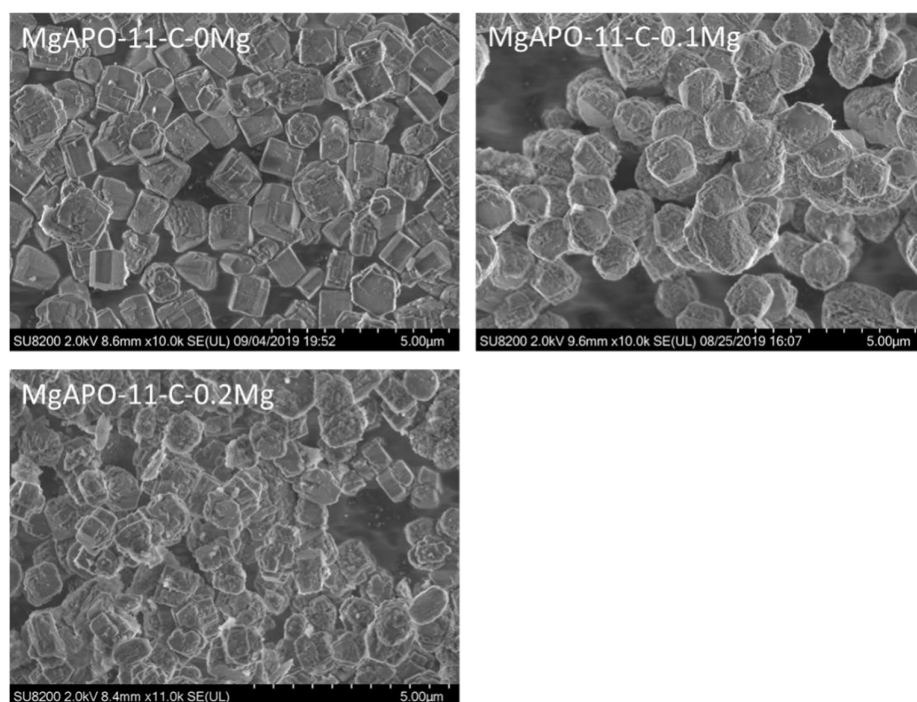

**Figure S3.** SEM images of MgAPO-11-C samples with different Mg contents.

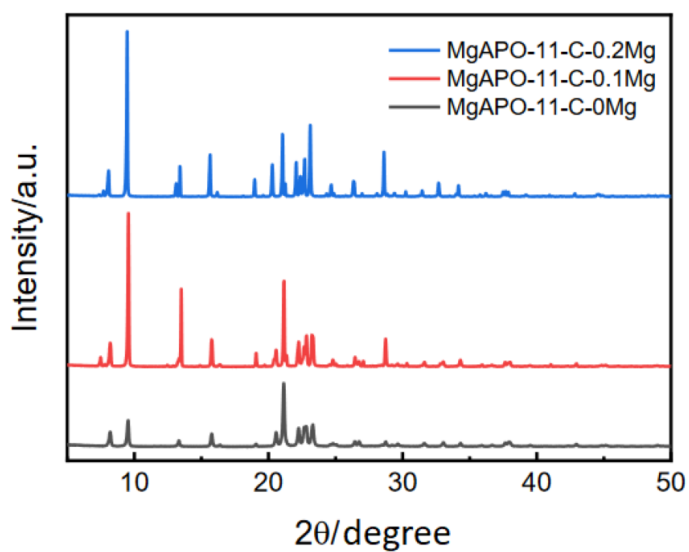

**Figure S4.** XRD patterns of the MgAPO-11-C samples with different Mg contents.

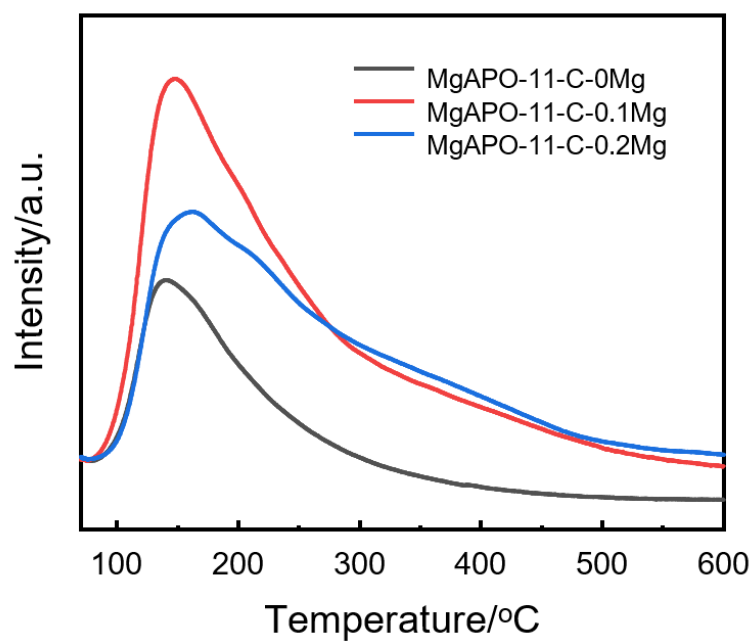

**Figure S5.**  $\text{NH}_3$ -TPD profiles of the MgAPO-11-C samples with different Mg contents.

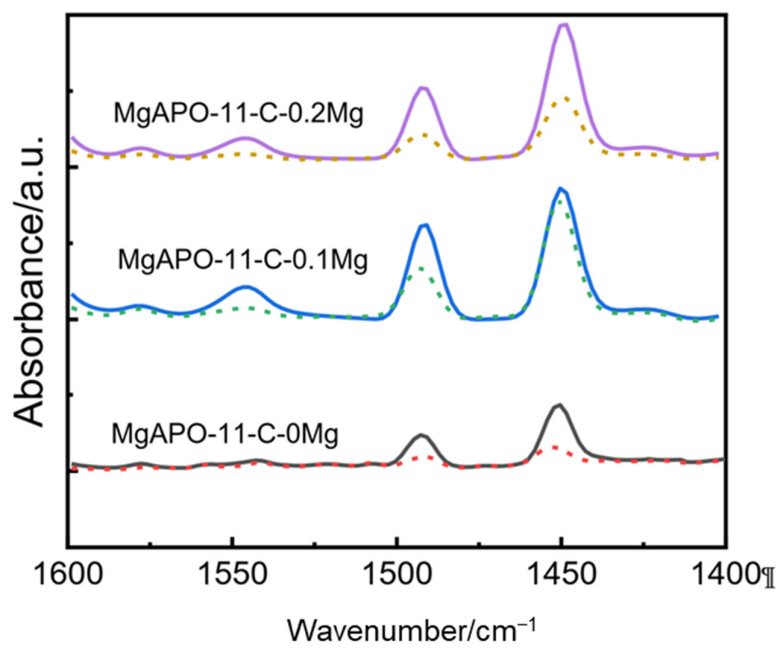

**Figure S6.** Py-IR spectra of MgAPO-11 with different Mg contents.

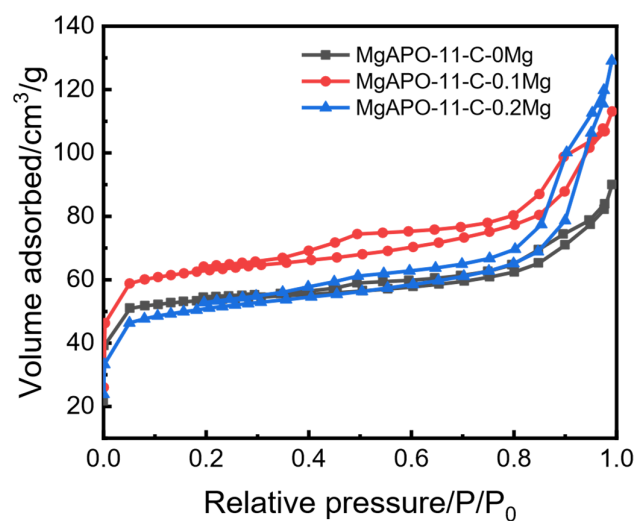

**Figure S7.** N<sub>2</sub> adsorption and desorption isotherms of the MgAPO-11-C samples with different Mg contents.

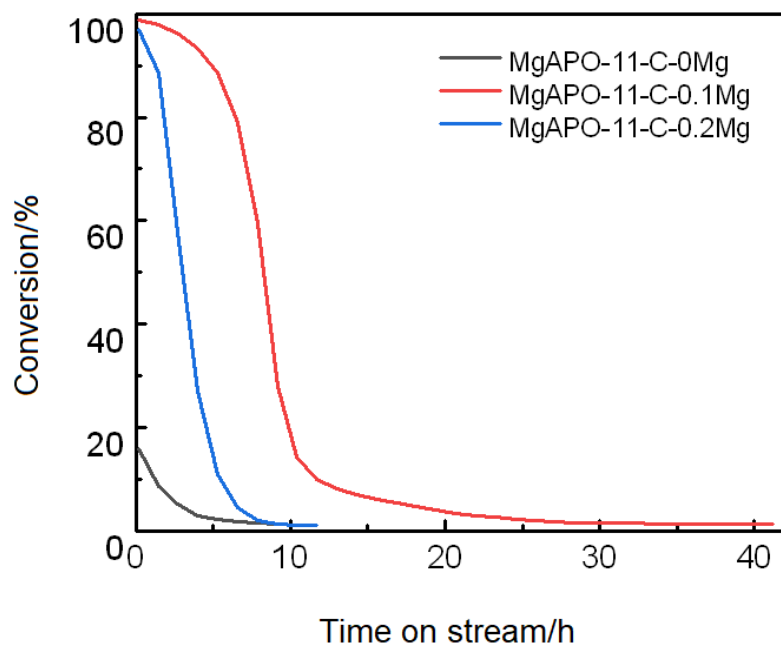

**Figure S8.** Methanol conversion as a function of time on stream of the MgAPO-11-C samples with different Mg contents.

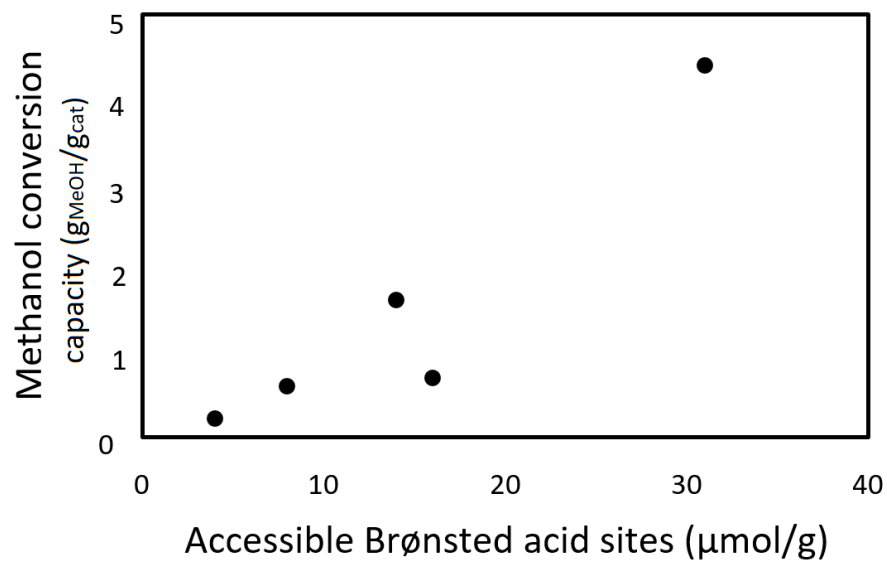

**Figure S9.** Methanol conversion capacity vs. accessible Brønsted acid sites in the five MgAPO-11 samples.

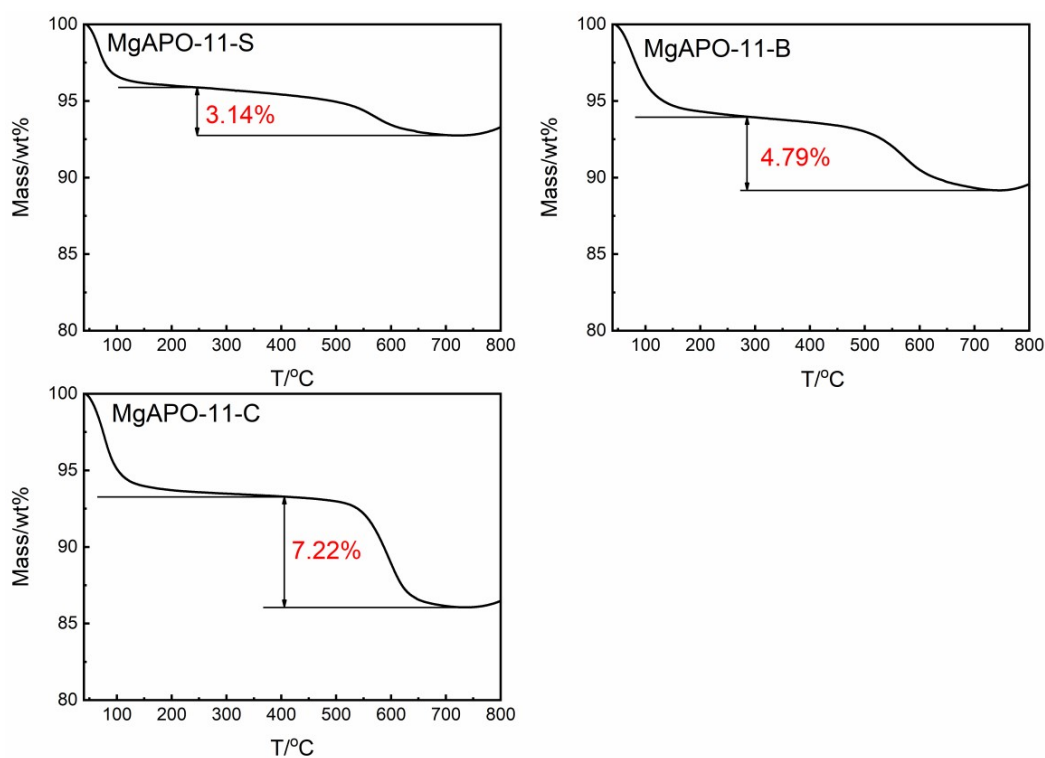

**Figure S10.** The TG curves of the three MgAPO-11 samples with distinct morphologies after reaction.

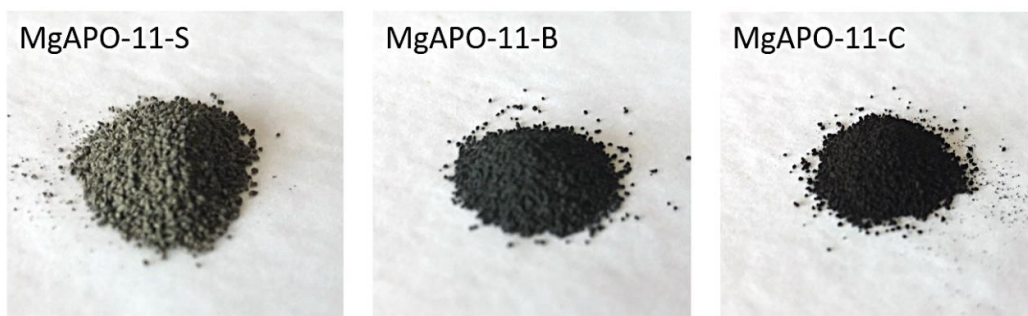

**Figure S11.** The photos of the three MgAPO-11 samples after reaction.
